# Supplementary material for: Identification of TLN1 as a prognostic biomarker to effect cell proliferation and differentiation in acute myeloid leukemia
Source: BMC Cancer. 2022 Sep 29;22:1027. doi: 10.1186/s12885-022-10099-0 (PMC9520853; doi:10.1186/s12885-022-10099-0)
Supplement: Supplementary file 4 — Additional file 4. [file 12885_2022_10099_MOESM4_ESM.xlsx]

## Sheet: Sheet 1
Supplementary material: Expression data of TLN1 in pan-cancer
组别1	组别2	数目	最小值	最大值	中位数(Median)	四分位距(IQR)	下四分位	上四分位	均值(Mean)	标准差(SD)	标准误(SE)
ACC	Normal	128	0	8.261	7.083	0.403	6.95	7.353	7.095	0.718	0.063
ACC	Tumor	77	4.322	9.331	7.001	0.727	6.623	7.35	6.961	0.829	0.094
BLCA	Normal	28	5.373	9.779	7.527	2.186	6.667	8.854	7.807	1.27	0.24
BLCA	Tumor	407	1.941	8.665	6.424	0.932	5.962	6.894	6.421	0.807	0.04
BRCA	Normal	292	4.179	8.536	7.441	0.621	7.139	7.759	7.415	0.533	0.031
BRCA	Tumor	1099	3.71	9.007	6.74	0.616	6.405	7.021	6.68	0.563	0.017
CESC	Normal	13	5.594	8.885	7.994	1.095	7.326	8.421	7.753	0.914	0.253
CESC	Tumor	306	1.506	7.989	6.408	0.671	6.038	6.709	6.297	0.758	0.043
CHOL	Normal	9	4.59	5.802	5.525	0.724	5.041	5.765	5.367	0.427	0.142
CHOL	Tumor	36	5.157	8.346	6.746	0.692	6.436	7.128	6.789	0.681	0.113
COAD	Normal	349	0	9.655	8.309	2.184	6.718	8.902	7.825	1.414	0.076
COAD	Tumor	290	3.424	8.382	6.457	0.778	6.103	6.881	6.443	0.673	0.04
DLBC	Normal	444	2.488	9.714	6.775	1.114	6.332	7.445	6.789	0.996	0.047
DLBC	Tumor	47	3.378	8.414	6.901	1.582	6.156	7.738	6.861	1.042	0.152
ESCA	Normal	666	0	10.192	8.488	2.571	6.542	9.113	7.844	1.456	0.056
ESCA	Tumor	182	5.453	9.352	7	0.769	6.678	7.447	7.04	0.618	0.046
GBM	Normal	1157	0	7.524	4.999	1.073	4.559	5.633	5.041	0.811	0.024
GBM	Tumor	166	4.353	8.181	6.866	0.863	6.394	7.256	6.764	0.748	0.058
HNSC	Normal	44	2.722	6.681	5.75	0.46	5.548	6.008	5.659	0.742	0.112
HNSC	Tumor	520	2.307	10.966	6.52	0.943	5.975	6.918	6.442	0.886	0.039
KICH	Normal	53	0	7.864	6.71	1.169	5.877	7.046	6.344	1.284	0.176
KICH	Tumor	66	5.03	7.555	6.243	0.584	6.003	6.587	6.271	0.503	0.062
KIRC	Normal	100	0	8.191	6.798	0.631	6.375	7.006	6.591	0.957	0.096
KIRC	Tumor	531	2.411	8.269	7.273	0.678	6.874	7.551	7.132	0.657	0.029
KIRP	Normal	60	0	7.864	6.884	0.783	6.357	7.141	6.555	1.192	0.154
KIRP	Tumor	289	3.448	8.138	6.918	0.672	6.562	7.234	6.835	0.605	0.036
LAML	Normal	70	6.095	7.634	6.947	0.251	6.862	7.113	6.978	0.245	0.029
LAML	Tumor	173	3.391	9.462	7.455	0.926	6.955	7.881	7.414	0.791	0.06
LGG	Normal	1152	0	7.524	4.996	1.073	4.559	5.632	5.038	0.81	0.024
LGG	Tumor	523	3.391	8.147	6.604	0.723	6.217	6.94	6.569	0.578	0.025
LIHC	Normal	160	3.498	8.043	5.59	1.037	5.075	6.112	5.641	0.764	0.06
LIHC	Tumor	371	2.284	7.947	6.071	0.864	5.604	6.468	5.961	0.874	0.045
LUAD	Normal	347	0	9.035	7.977	0.541	7.694	8.234	7.899	0.66	0.035
LUAD	Tumor	515	2.971	8.292	6.858	0.692	6.443	7.135	6.712	0.685	0.03
LUSC	Normal	338	0	9.035	7.987	0.531	7.705	8.236	7.914	0.659	0.036
LUSC	Tumor	498	3.391	9.492	6.501	0.843	6.037	6.88	6.462	0.745	0.033
MESO	Tumor	87	4.382	8.624	7.659	0.667	7.343	8.01	7.605	0.591	0.063
OV	Normal	88	6.684	9.244	7.306	0.382	7.114	7.497	7.361	0.414	0.044
OV	Tumor	427	0	9.271	6.457	1.203	5.808	7.011	6.361	0.94	0.045
PAAD	Normal	171	0	7.67	5.116	0.625	4.842	5.467	5.122	0.838	0.064
PAAD	Tumor	179	3.287	11.824	6.901	0.712	6.536	7.248	6.858	0.809	0.06
PCPG	Normal	3	7.436	8.015	7.459	0.289	7.448	7.737	7.637	0.328	0.189
PCPG	Tumor	182	4.379	8.139	7.299	0.666	6.883	7.549	7.17	0.605	0.045
PRAD	Normal	152	5.42	9.329	7.435	0.797	7.068	7.865	7.514	0.719	0.058
PRAD	Tumor	496	3.928	8.384	6.772	0.649	6.423	7.072	6.719	0.589	0.026
READ	Normal	318	0	9.655	8.468	2.055	6.876	8.931	7.921	1.433	0.08
READ	Tumor	93	2.406	7.979	6.455	0.675	6.119	6.794	6.423	0.711	0.074
SARC	Normal	2	6.596	8.95	7.773	1.177	7.184	8.361	7.773	1.665	1.177
SARC	Tumor	262	1.556	9.974	7.721	1.204	7.255	8.46	7.788	0.982	0.061
SKCM	Normal	813	4.233	8.869	6.96	0.875	6.558	7.433	6.987	0.573	0.02
SKCM	Tumor	469	4.403	9.223	7.175	0.739	6.803	7.542	7.175	0.626	0.029
STAD	Normal	210	0	9.778	6.246	2.471	5.687	8.159	6.694	1.558	0.107
STAD	Tumor	414	4.346	9.729	6.639	1.134	6.059	7.193	6.672	0.867	0.043
TGCT	Normal	165	5.949	7.812	6.585	0.354	6.409	6.763	6.642	0.348	0.027
TGCT	Tumor	154	2.842	8.34	6.522	0.763	6.134	6.897	6.451	0.761	0.061
THCA	Normal	338	0	7.971	7.194	0.419	6.977	7.396	7.136	0.554	0.03
THCA	Tumor	512	2.367	7.93	6.794	0.514	6.484	6.998	6.688	0.554	0.024
THYM	Normal	446	2.488	9.714	6.779	1.121	6.333	7.454	6.795	0.997	0.047
THYM	Tumor	119	2.746	8.521	7.246	0.863	6.724	7.587	6.972	1.003	0.092
UCEC	Normal	101	6.689	9.446	8.343	0.752	7.949	8.701	8.284	0.621	0.062
UCEC	Tumor	181	1.986	8.004	6.45	0.921	5.901	6.822	6.168	1.079	0.08
UCS	Normal	78	7.337	9.446	8.514	0.636	8.195	8.83	8.469	0.483	0.055
UCS	Tumor	57	4.839	7.476	6.518	0.717	6.155	6.872	6.47	0.605	0.08
UVM	Tumor	79	6.368	8.7	7.449	0.601	7.152	7.753	7.443	0.508	0.057
